# Supplementary material for: Demographics and Yield–Per–Recruit Assessment of the Vulnerable Spiny Lobster Palinurus elephas in the Azores—Implications for Conservation and Fisheries Management
Source: MDPI journal article supplement (doi:10.3390/biology11030474), 2022-03-19
Supplement: s1 [file s1]

## Article

# Demographics and Yield–Per–Recruit Assessment of the Vulnerable Spiny Lobster *Palinurus Elephas* in the Azores—Implications for Conservation and Fisheries Management

Régis Santos <sup>1,2,\*</sup>, Ualerson Iran Peixoto <sup>1,2</sup>, Wendell Medeiros-Leal <sup>1,2</sup>, Rui M. Sequeira <sup>3</sup>, Ana Novoa-Pabon <sup>1</sup> and Mário Pinho <sup>1,2</sup>

<sup>1</sup> Okeanos—UAc Instituto de Investigação em Ciências do Mar, Universidade dos Açores, Rua Prof. Dr. Frederico Machado, 4, 9900-138 Horta, Portugal; ualerson.ip.silva@uac.pt (U.I.P.); wendell.mm.silva@uac.pt (W.M.-L.); ana.mn.pabon@uac.pt (A.N.-P.); mario.rr.pinho@uac.pt (M.P.)

<sup>2</sup> IMAR Instituto do Mar, Departamento de Oceanografia e Pescas, Universidade dos Açores, Rua Prof. Dr. Frederico Machado, 4, 9901-862 Horta, Portugal

<sup>3</sup> Serviço de Ambiente e Alterações Climáticas de São Jorge, Secretaria Regional do Ambiente e Alterações Climáticas, Governo dos Açores, Rua Nova—Relvinha, 9850-042 Calheta, Portugal; rmsequeira@sapo.pt

\* Correspondence: regisvinicius@gmail.com; Tel.: +351-292200400

## Supplementary Materials

**Table S1.** Results of Bonferroni post–hoc test for comparing mean catch per unit effort (ind. trap<sup>−1</sup>) of *Palinurus elephas* between depth strata. Significance level was set at 0.05.

**Table S2.** Results of Bonferroni post–hoc test for comparing mean carapace lengths of *Palinurus elephas* between depth strata. Significance level was set at 0.05.

**Table S3.** Results of Chi–square test for comparing sex ratio (M:F) of *Palinurus elephas* between size classes and depth strata. Significance level was set at 0.05. CL: carapace length.

**Table S4.** Summary of ANOVA statistics to determine differences in length–weight relationships between sexes. WW: wet weight; CL: carapace length; fsex: sex as a group factor variable; M: males.

**Figure S1.** Plots of the log-transformed length–weight relationships illustrating observed intercept differences between males (M) and females (F) of *Palinurus elephas* from the Azores. See Table S4 for statistic results.

**Figure S2.** Von Bertalanffy growth curve and individual growth increments for males (a) and females (b) of *Palinurus elephas* from the Azores. Red dashed lines represent 0.95 confidence intervals.

**Table S1.** Results of Bonferroni post-hoc test for comparing mean catch per unit effort (ind. trap<sup>-1</sup>) of *Palinurus elephas* between depth strata. Significance level was set at 0.05.

| Level (a) | Level (b) | <i>p</i> -Value | No Difference |
|-----------|-----------|-----------------|---------------|
| 100–120   | 120–140   | 1.000           | Not reject    |
| 100–120   | 140–160   | 0.539           | Not reject    |
| 100–120   | 160–180   | 1.000           | Not reject    |
| 100–120   | 180–200   | 1.000           | Not reject    |
| 100–120   | 200–220   | 1.000           | Not reject    |
| 100–120   | 220–240   | < 0.001         | Reject        |
| 100–120   | 40–60     | < 0.001         | Reject        |
| 100–120   | 60–80     | < 0.001         | Reject        |
| 100–120   | 80–100    | 1.000           | Not reject    |
| 120–140   | 140–160   | 1.000           | Not reject    |
| 120–140   | 160–180   | 1.000           | Not reject    |
| 120–140   | 180–200   | 1.000           | Not reject    |
| 120–140   | 200–220   | 1.000           | Not reject    |
| 120–140   | 220–240   | 0.054           | Not reject    |
| 120–140   | 40–60     | 0.395           | Not reject    |
| 120–140   | 60–80     | 1.000           | Not reject    |
| 120–140   | 80–100    | 1.000           | Not reject    |
| 140–160   | 160–180   | 1.000           | Not reject    |
| 140–160   | 180–200   | 1.000           | Not reject    |
| 140–160   | 200–220   | 1.000           | Not reject    |
| 140–160   | 220–240   | 0.911           | Not reject    |
| 140–160   | 40–60     | 1.000           | Not reject    |
| 140–160   | 60–80     | 1.000           | Not reject    |
| 140–160   | 80–100    | 1.000           | Not reject    |
| 160–180   | 180–200   | 1.000           | Not reject    |
| 160–180   | 200–220   | 1.000           | Not reject    |
| 160–180   | 220–240   | 1.000           | Not reject    |
| 160–180   | 40–60     | 1.000           | Not reject    |
| 160–180   | 60–80     | 1.000           | Not reject    |
| 160–180   | 80–100    | 1.000           | Not reject    |
| 180–200   | 200–220   | 1.000           | Not reject    |
| 180–200   | 220–240   | 1.000           | Not reject    |
| 180–200   | 40–60     | 1.000           | Not reject    |
| 180–200   | 60–80     | 1.000           | Not reject    |
| 180–200   | 80–100    | 1.000           | Not reject    |
| 200–220   | 220–240   | 1.000           | Not reject    |
| 200–220   | 40–60     | 1.000           | Not reject    |
| 200–220   | 60–80     | 1.000           | Not reject    |
| 200–220   | 80–100    | 1.000           | Not reject    |
| 200–220   | 40–60     | 1.000           | Not reject    |
| 220–240   | 60–80     | 0.038           | Reject        |
| 220–240   | 80–100    | < 0.001         | Reject        |
| 40–60     | 60–80     | 1.000           | Not reject    |
| 40–60     | 80–100    | < 0.001         | Reject        |
| 60–80     | 80–100    | < 0.001         | Reject        |

**Table S2.** Results of Bonferroni post-hoc test for comparing mean carapace lengths of *Palinurus elephas* between depth strata. Significance level was set at 0.05.

| Level (a) | Level (b) | <i>p</i> -Value | No Difference |
|-----------|-----------|-----------------|---------------|
| 100–120   | 120–140   | 0.636           | Not reject    |
| 100–120   | 140–160   | 1.000           | Not reject    |
| 100–120   | 160–180   | 0.060           | Not reject    |
| 100–120   | 180–200   | 0.445           | Not reject    |
| 100–120   | 200–220   | < 0.001         | Reject        |
| 100–120   | 40–60     | < 0.001         | Reject        |
| 100–120   | 60–80     | < 0.001         | Reject        |
| 100–120   | 80–100    | 0.013           | Reject        |
| 120–140   | 140–160   | 1.000           | Not reject    |
| 120–140   | 160–180   | 0.010           | Reject        |
| 120–140   | 180–200   | 0.165           | Not reject    |
| 120–140   | 200–220   | < 0.001         | Reject        |
| 120–140   | 40–60     | 0.130           | Not reject    |
| 120–140   | 60–80     | 0.461           | Not reject    |
| 120–140   | 80–100    | 1.000           | Not reject    |
| 140–160   | 160–180   | 0.002           | Reject        |
| 140–160   | 180–200   | 0.089           | Not reject    |
| 140–160   | 200–220   | < 0.001         | Reject        |
| 140–160   | 40–60     | 1.000           | Not reject    |
| 140–160   | 60–80     | 1.000           | Not reject    |
| 140–160   | 80–100    | 1.000           | Not reject    |
| 160–180   | 180–200   | 1.000           | Not reject    |
| 160–180   | 200–220   | 1.000           | Not reject    |
| 160–180   | 40–60     | 0.001           | Reject        |
| 160–180   | 60–80     | 0.003           | Reject        |
| 160–180   | 80–100    | 0.020           | Reject        |
| 180–200   | 200–220   | 1.000           | Not reject    |
| 180–200   | 40–60     | 0.034           | Reject        |
| 180–200   | 60–80     | 0.057           | Not reject    |
| 180–200   | 80–100    | 0.187           | Not reject    |
| 200–220   | 40–60     | < 0.001         | Reject        |
| 200–220   | 60–80     | < 0.001         | Reject        |
| 200–220   | 80–100    | < 0.001         | Reject        |
| 40–60     | 60–80     | 1.000           | Not reject    |
| 40–60     | 80–100    | 0.016           | Reject        |
| 60–80     | 80–100    | 0.016           | Reject        |

**Table S3.** Results of Chi-square test for comparing sex ratio (M:F) of *Palinurus elephas* between size classes and depth strata. Significance level was set at 0.05. CL: carapace length.

| CL (mm) | Sex Ratio | Chi-Square ( $\chi^2$ ) | <i>p</i> -Value |
|---------|-----------|-------------------------|-----------------|
| 30–40   | 0:1       | 1.00                    | 0.317           |
| 40–50   | 1.33:1    | 0.14                    | 0.705           |
| 50–60   | 1:1       | 0.00                    | 1.000           |
| 60–70   | 1:1       | 0.00                    | 1.000           |
| 70–80   | 2.14:1    | 11.64                   | 0.001           |
| 80–90   | 1.36:1    | 1.37                    | 0.241           |
| 90–100  | 0.23:1    | 23.20                   | < 0.001         |
| 100–110 | 0.38:1    | 19.76                   | < 0.001         |
| 110–120 | 0.26:1    | 59.65                   | < 0.001         |
| 120–130 | 0.13:1    | 86.16                   | < 0.001         |
| 130–140 | 0.12:1    | 47.37                   | < 0.001         |
| 140–150 | 10:1      | 22.09                   | < 0.001         |
| 150–160 | 1:0       | 37.00                   | < 0.001         |
| 160–170 | 1:0       | 11.00                   | 0.001           |
| 170–180 | 1:0       | 3.00                    | 0.083           |

  

| Depth Stratum (m) | Sex Ratio | Chi-Square ( $\chi^2$ ) | <i>p</i> -Value |
|-------------------|-----------|-------------------------|-----------------|
| 40–60             | 0.32:1    | 8.76                    | 0.003           |
| 60–80             | 0.88:1    | 0.43                    | 0.514           |
| 80–100            | 0.39:1    | 56.39                   | < 0.001         |
| 100–120           | 0.7:1     | 11.79                   | 0.001           |
| 120–140           | 0.42:1    | 8.31                    | 0.004           |
| 140–160           | 0.83:1    | 0.22                    | 0.641           |
| 160–180           | 2.5:1     | 1.29                    | 0.257           |
| 180–200           | 1.67:1    | 0.50                    | 0.480           |
| 200–220           | 1.75:1    | 0.82                    | 0.366           |
| 220–240           | 0:1       | 1.00                    | 0.317           |

**Table S4.** Summary of ANOVA statistics to determine differences in length–weight relationships between sexes. WW: wet weight; CL: carapace length; fsex: sex as a group factor variable; M: males.

| <b>Analysis of Variance Table</b> |             |               |                |                |                       |
|-----------------------------------|-------------|---------------|----------------|----------------|-----------------------|
| Response: logWW                   |             |               |                |                |                       |
|                                   | <b>d.f.</b> | <b>Sum Sq</b> | <b>Mean Sq</b> | <b>F value</b> | <b><i>p</i>-value</b> |
| logCL                             | 1           | 300.128       | 300.128        | 20435.03       | <0.001                |
| fsex                              | 1           | 0.711         | 0.711          | 48.4233        | <0.001                |
| logCL:fsex                        | 1           | 0.046         | 0.046          | 3.1209         | 0.078                 |
| Residuals                         | 407         | 5.978         | 0.015          |                |                       |
| <b>Confidence interval</b>        |             |               |                |                |                       |
|                                   | <b>2.5%</b> | <b>97.5%</b>  |                |                |                       |
| (Intercept)                       | −6.16916    | −5.81391      |                |                |                       |
| logCL                             | 2.771077    | 2.848631      |                |                |                       |
| fsexM                             | −0.10689    | −0.0597       |                |                |                       |

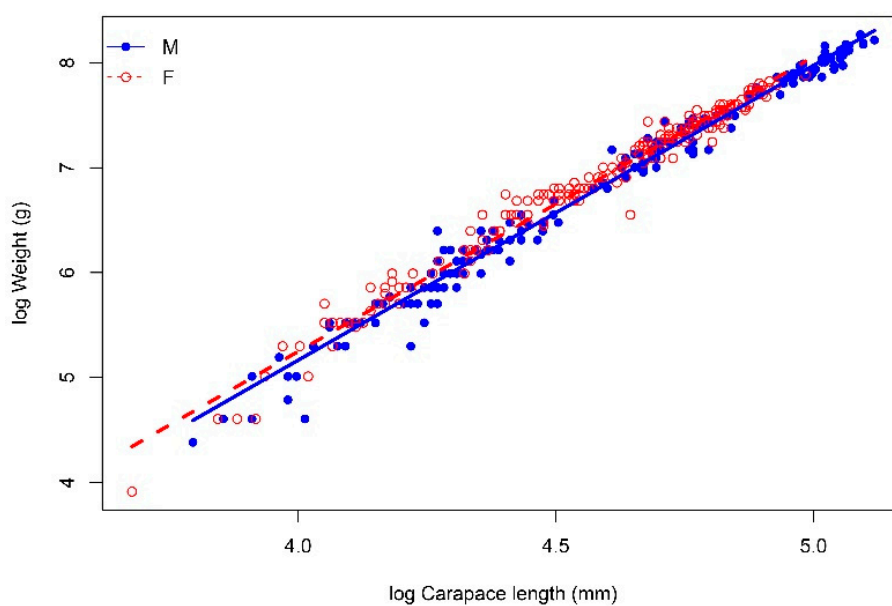

**Figure S1.** Plots of the log-transformed length–weight relationships illustrating observed intercept differences between males (M) and females (F) of *Palinurus elephas* from the Azores. See Table S4 for statistic results.

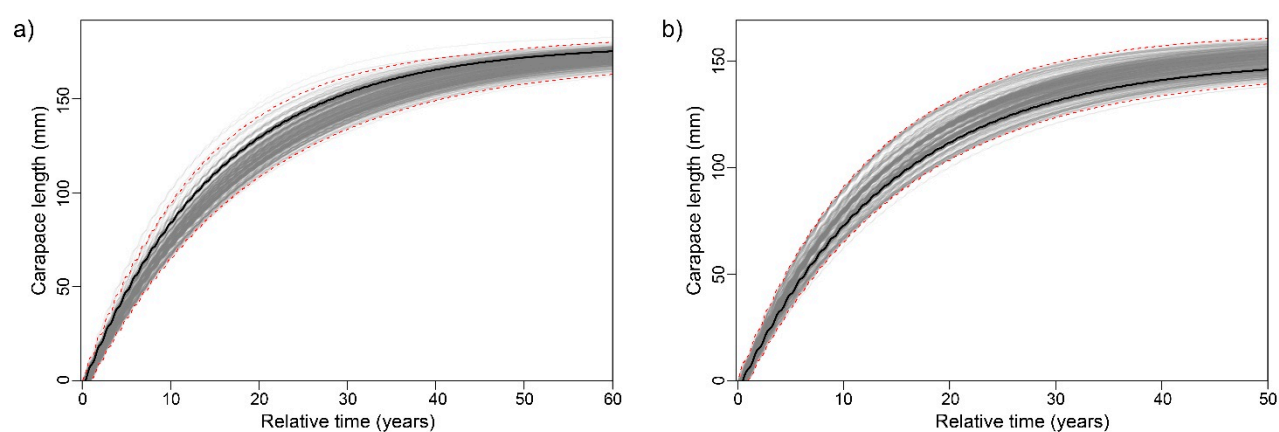

**Figure S2.** Von Bertalanffy growth curve and individual growth increments for males (a) and females (b) of *Palinurus elephas* from the Azores. Red dashed lines represent 0.95 confidence intervals.
